1 Title:

2 **P38 $\alpha$  Regulates Expression of DUX4 in Facioscapulohumeral Muscular Dystrophy**

3

4 Authors and affiliations:

5 L. Alejandro Rojas<sup>1,\*</sup>, Erin Valentine<sup>1</sup>, Anthony Accorsi<sup>1</sup>, Joseph Maglio<sup>1</sup>, Ning Shen<sup>1</sup>, Alan  
6 Robertson<sup>1</sup>, Steven Kazmirski<sup>1</sup>, Peter Rahl<sup>1</sup>, Rabi Tawil<sup>2</sup>, Diego Cadavid<sup>1</sup>, Lorin A. Thompson<sup>1</sup>,  
7 Lucienne Ronco<sup>1</sup>, Aaron N. Chang<sup>1</sup>, Angela M. Cacace<sup>1</sup>, Owen Wallace<sup>1</sup>.

8 <sup>1</sup>Fulcrum Therapeutics, 26 Landsdowne Street, 5<sup>th</sup> floor, Cambridge, MA 02139, USA.

9 <sup>2</sup>University of Rochester Medical Center, Department of Neurology, Rochester, NY 14642, USA

10 \*Correspondence to [arojas@fulcrumtx.com](mailto:arojas@fulcrumtx.com)

11

12 Keywords:

13 FSHD, facioscapulohumeral dystrophy, muscular dystrophy, DUX4, p38, p38 alpha, mitogen-  
14 activated protein kinase, MAPK14, MAPK, SAPK, myogenesis, microsatellite, D4Z4 repeats,  
15 small molecule, inhibitor.

16

17 **SUMMARY**

18 FSHD is caused by the loss of repression at the *D4Z4* locus leading to DUX4 expression in  
19 skeletal muscle, activation of its early embryonic transcriptional program and muscle fiber death.  
20 While progress toward understanding the signals driving DUX4 expression has been made, the  
21 factors and pathways involved in the transcriptional activation of this gene remain largely  
22 unknown. Here, we describe the identification and characterization of p38 $\alpha$  as a novel regulator  
23 of DUX4 expression in FSHD myotubes. By using multiple highly characterized, potent and  
24 specific inhibitors of p38 $\alpha/\beta$ , we show a robust reduction of DUX4 expression, activity and cell  
25 death across FSHD1 and FSHD2 patient-derived lines. RNA-seq profiling reveals that a small  
26 number of genes are differentially expressed upon p38 $\alpha/\beta$  inhibition, the vast majority of which  
27 are DUX4 target genes. Our results reveal a novel and apparently critical role for p38 $\alpha$  in the  
28 aberrant activation of DUX4 in FSHD and support the potential of p38 $\alpha/\beta$  inhibitors as effective  
29 therapeutics to treat FSHD at its root cause.

## 30 INTRODUCTION

31 Facioscapulohumeral muscular dystrophy (FSHD) is a rare and disabling disease with an  
32 estimated worldwide population prevalence of between 1 in 8,000-20,000 (Deenen et al., 2014;  
33 Statland and Tawil, 2014). Most cases are familial and inherited in an autosomal dominant fashion  
34 and about 30% of cases are known to be sporadic. FSHD is characterized by progressive skeletal  
35 muscle weakness affecting the face, shoulders, arms, and trunk, followed by weakness of the  
36 distal lower extremities and pelvic girdle. Initial symptoms typically appear in the second decade  
37 of life but can occur at any age resulting in significant physical disability in later decades (Tawil et  
38 al., 2015). There are currently no approved treatments for this disease.

39 FSHD is caused by aberrant expression of the *DUX4* gene, a homeobox transcription factor in  
40 the skeletal muscle of patients. This gene is located within the *D4Z4* macrosatellite repeats on  
41 chromosome 4q35. *DUX4* is not expressed in adult skeletal muscle when the number of repeats  
42 is >10 and the locus is properly silenced (Lemmers et al., 2010). In the majority of patients with  
43 FSHD (FSHD1), the *D4Z4* array is contracted to 1–9 repeat units on one allele. FSHD1 patients  
44 carrying a smaller number of repeats (1–3 units) are on average more severely affected than  
45 those with a higher number of repeats (8-9) (Tawil et al., 1996). Loss of these repetitive elements  
46 (referred to as contraction) leads to de-repression of the *D4Z4* locus and ensuing aberrant *DUX4*  
47 expression activation in skeletal muscle (de Greef et al., 2009; Wang et al., 2018). In FSHD2,  
48 patients manifest similar signs and symptoms as described above but genetically differ from  
49 FSHD1. These patients have longer *D4Z4* repeats but exhibit similar derepression of the *D4Z4*  
50 locus with low levels of DNA methylation (Calandra et al., 2016; Jones et al., 2014; 2015). This  
51 loss of chromatin repression is caused by mutations in *SMCHD1*, an important factor in the proper  
52 deposition of DNA methylation across the genome (Dion et al., 2019; Jansz et al., 2017).  
53 *SMCHD1* has also been identified as the cause of Bosma arhinia microphthalmia syndrome  
54 (BAMS), a rare condition characterized by the lack of an external nose (Gordon et al., 2017; Mul

55 et al., 2018; Shaw et al., 2017). Similarly, modifiers of the disease, such as *DNMT3B*, are thought  
56 to participate in the establishment of silencing (van den Boogaard et al., 2016).

57 *DUX4* expression in skeletal muscle as a result of the *D4Z4* repeat contraction or *SMCHD1*  
58 mutations leads to activation of a downstream transcriptional program that causes FSHD  
59 (Bosnakovski et al., 2014; Homma et al., 2015; Jagannathan et al., 2016; Shadle et al., 2017; Yao  
60 et al., 2014). Major target genes of *DUX4* are members of the *DUX* family itself and other  
61 homeobox transcription factors. Additional target genes include highly homologous gene families  
62 that are clustered on chromosomes, including the preferentially expressed in melanoma  
63 (*PRAMEF*), tripartite motif-containing (*TRIM*), methyl-CpG binding protein-like (*MBDL*), zinc  
64 finger and SCAN domain containing (*ZSCAN*) and ret-finger protein-like (*RFPL*) families (Geng  
65 et al., 2011; Shadle et al., 2017; Tawil et al., 2014; Yao et al., 2014). Expression of *DUX4* and its  
66 downstream transcriptional program in skeletal muscle cells is toxic, leading to oxidative stress,  
67 interference with sarcomere organization, impairment of contractile function and cell death  
68 (Bosnakovski et al., 2014; Himeda et al., 2015; Homma et al., 2015; Rickard et al., 2015; Statland  
69 et al., 2015; Tawil et al., 2014).

70 Several groups have made progress towards understanding the molecular mechanisms  
71 regulating *DUX4* expression (van den Boogaard et al., 2015; Campbell et al., 2018;  
72 van den Boogaard et al., 2016). However, factors that drive transcriptional activation of *DUX4* in  
73 the skeletal muscle of FSHD patients are still largely unknown. By screening our annotated  
74 chemical probe library to identify disease-modifying small molecule drug targets that reduce  
75 *DUX4* expression in FSHD myotubes, we have identified multiple chemical scaffolds that inhibit  
76 p38  $\alpha$  and  $\beta$  mitogen-activated protein kinase (*MAPK*). We found that inhibitors of p38 $\alpha$  kinase or  
77 its genetic knockdown, reduce *DUX4* and its downstream gene expression program in FSHD  
78 myotubes, thereby impacting the core pathophysiology of FSHD.

79 Members of the p38 MAPK family, composed of  $\alpha$ ,  $\beta$ ,  $\gamma$  and  $\delta$ , isoforms are encoded on separate  
80 genes and play a critical role in cellular responses needed for adaptation to stress and survival  
81 (Krementsov et al., 2013; Martin et al., 2015; Whitmarsh, 2010). In many inflammatory,  
82 cardiovascular and chronic disease states, p38 MAPK stress-induced signals can trigger  
83 maladaptive responses that aggravate, rather than alleviate, the disease process (Martin et al.,  
84 2015; Whitmarsh, 2010). Similarly, in skeletal muscle, a variety of cellular stresses including  
85 chronic exercise, insulin exposure and altered endocrine states, myoblast differentiation, reactive  
86 oxygen species as well as apoptosis have all been shown to induce the p38 kinase pathways  
87 (Keren et al., 2006; Zarubin and Han, 2005). Moreover, these pathways can be activated by a  
88 number of external stimuli, including pro-inflammatory cytokines and cellular stress environments,  
89 that lead to activation of the dual-specificity MAPK kinases MKK3 and MKK6. Activation of MKK3  
90 and MKK6, which in turn phosphorylate p38 in its activation loop, trigger downstream  
91 phosphorylation events. These include phosphorylation of other kinases, downstream effectors  
92 like HSP27 and transcription factors culminating in gene expression changes in the nucleus  
93 (Cuenda and Rousseau, 2007; Kyriakis and Avruch, 2001; Viemann et al., 2004).

94 P38 $\alpha$  is the most abundantly expressed isoform in skeletal muscle and it has an important role in  
95 the development of skeletal muscle tissue, controlling the activity of transcription factors that drive  
96 myogenesis (Knight et al., 2012; Segalés et al., 2016; Simone et al., 2004). P38 $\alpha$  abrogation in  
97 mouse myoblasts inhibits fusion and myotube formation *in vitro* (Perdiguero et al., 2007; Zetser  
98 et al., 1999). However, conditional ablation of p38 $\alpha$  in the adult mouse skeletal muscle tissue  
99 appears to be well-tolerated and alleviates some of the phenotypes observed in models of other  
100 muscular dystrophies (Wissing et al., 2014).

101 Here, we show that selective p38 $\alpha/\beta$  inhibitors potently decrease the expression of DUX4, its  
102 downstream gene program and cell death in FSHD myotubes across a variety of FSHD1 and

103 FSHD2 genotypes. Using RNA-seq and high content image analysis we also demonstrated that

104 myogenesis is not affected at concentrations that result in downregulation of DUX4.

105

## 106 RESULTS

### 107 Identification of inhibitors of DUX4 expression

108 To model FSHD *in vitro*, we differentiated FSHD1 patient-derived immortalized myoblasts into  
109 skeletal muscle myotubes. We allowed myoblasts to reach >70% confluency and added  
110 differentiation medium lacking growth factors (Figure 1A) (Brewer et al., 2008; Krom et al., 2012;  
111 Thorley et al., 2016). After one day of differentiation, we detected DUX4 expression by RT-qPCR  
112 and its expression increased throughout the course of myogenic fusion and formation of post-  
113 mitotic, multinucleated FSHD myotubes (Figure 1B). Because of the stochastic and low  
114 expression levels of DUX4 in FSHD cells, we measured DUX4-regulated genes as an amplified  
115 readout of the expression and activity of DUX4. These include *ZSCAN4*, *MBD3L2*, *TRIM43*,  
116 *LEUTX* and *KHDC1L* which are among the most commonly described DUX4 targets (Chen et al.,  
117 2016; Geng et al., 2011; Jagannathan et al., 2016; Tasca et al., 2012; Wang et al., 2018; Whiddon  
118 et al., 2017; Yao et al., 2014). These genes were downregulated after DUX4 antisense  
119 oligonucleotide treatment of FSHD myotubes and were nearly undetectable or completely absent  
120 in FSHD myoblasts or wild-type myotubes (Figure 1C). We concluded that these transcripts were  
121 solely dependent on DUX4 expression in differentiating myotubes. Although a number of DUX4-  
122 dependent transcripts have been previously described, we selected an assay to specifically detect  
123 *MBD3L2* for high-throughput screening because it displayed the best signal window of differential  
124 expression in our *in vitro* system comparing FSHD to healthy wildtype myotubes (Figure 1D). With  
125 this assay, we identified several small molecules that reduced *MBD3L2* expression after 5 days  
126 of differentiation and treatment and showed good reproducibility across replicates (Figure 1E).  
127 Validating our results, we found several molecules identified previously to reduce DUX4  
128 expression, including BET inhibitors and  $\beta$ -adrenergic agonists exemplified in Figure S1  
129 (Campbell et al., 2017; Cruz et al., 2018). However, when treating differentiating FSHD myotubes  
130 in our assay, we observed a reduction in fusion as indicated by visual inspection and by the

131 reduction of *MYOG* expression with BET inhibitors. Importantly, we identified multiple scaffolds  
132 that inhibit p38  $\alpha$  and  $\beta$  and strongly inhibit the expression of *MBD3L2* without affecting  
133 differentiation.

#### 134 **p38 $\alpha$ signaling participates in the activation of DUX4 expression in FSHD myotubes**

135 Potent and selective inhibitors of p38 $\alpha/\beta$  have been previously explored in multiple clinical studies  
136 for indications associated with the role of p38 $\alpha$  in the regulation of the expression of inflammatory  
137 cytokines and cancer (Coulthard et al., 2009). We tested several p38 $\alpha/\beta$  inhibitors of different  
138 chemical scaffolds in our assays which showed significant inhibition of *MBD3L2* expression  
139 (Figure 2A). Importantly, half maximal inhibitory concentrations ( $IC_{50}$ ) obtained for *MBD3L2*  
140 reduction were comparable to reported values by other groups in unrelated cell-based assays  
141 that measured p38  $\alpha/\beta$  inhibition, suggesting the specificity for the assigned target (Campbell et  
142 al., 2014; Fehr et al., 2015; Underwood et al., 2000). P38 $\alpha$  and  $\beta$  kinases phosphorylate a myriad  
143 of substrates, including downstream kinases like MAPKAPK2 (also known as MK2) which  
144 phosphorylates effector molecules such as heat shock protein 27 (HSP27), as well as a variety  
145 of transcription factors including myogenic transcription factors like MEF2C (Knight et al., 2012;  
146 Segalés et al., 2016a; Simone et al., 2004). To determine p38 $\alpha/\beta$  signaling activity in  
147 differentiating myoblasts, we measured the levels of phosphorylation of HSP27. As reported  
148 previously, we observed increased p38 signaling rapidly upon addition of differentiation media  
149 (Figure S2) (Perdiguero et al., 2007). We observed P38 $\alpha/\beta$  inhibitors reduced phosphorylated  
150 HSP27 levels with similar  $IC_{50}$  values to that of *MBD3L2* (Figure 2B). To further validate our  
151 findings, we electroporated FSHD myoblasts with siRNAs against p38  $\alpha$  and  $\beta$ . After 3 days of  
152 differentiation, transient knockdown of p38 $\alpha$  showed robust inhibition of expression of *MBD3L2* in  
153 FSHD myotubes (Figure 2C) and no significant effects in fusion were observed (Figure S3). We  
154 observed that close to 50% reduction of *MAPK14* (p38 $\alpha$ ) mRNA was sufficient to inhibit *MBD3L2*  
155 expression without impacting myogenesis and this level of reduction may account for the



156 differences on myogenesis observed between this study and those previously reported using p38  
157 mouse knockout myoblasts (Perdiguero et al., 2007).

158 Our results suggest the p38 $\alpha$  pathway is an activator of DUX4 expression in FSHD muscle cells  
159 undergoing differentiation. To further understand the reduction in DUX4 expression, we measured  
160 the expression of DUX4 transcript and protein upon inhibition of p38  $\alpha$  and  $\beta$ . To measure protein,  
161 we developed a highly sensitive assay based on the electrochemiluminescent detection of DUX4  
162 on the Mesoscale Diagnostics (MSD) platform using two previously generated antibodies (Figure  
163 S4). We observed that p38 $\alpha/\beta$  inhibition resulted in a highly correlated reduction of DUX4  
164 transcript and protein (Figure 2D). We concluded this led to the reduction in the expression of  
165 DUX4 target gene, *MBD3L2*.

#### 166 **p38 $\alpha$ and $\beta$ inhibition normalizes gene expression of FSHD myotubes without impacting** 167 **the myogenic differentiation program**

168 We further examined the effect of p38  $\alpha$  and  $\beta$  selective inhibition on myotube formation because  
169 this pathway has been linked to muscle cell differentiation (Perdiguero et al., 2007; Segalés et al.,  
170 2016b; 2016a; Simone et al., 2004; Wissing et al., 2014). We developed a quantitative assay to  
171 measure cell fusion and myotube formation to assess skeletal muscle differentiation *in vitro*. In  
172 this assay, we stained immortalized FSHD myotubes cells using antibodies against Myosin Heavy  
173 Chains (MHC) and quantified the number of nuclei detected inside MHC-stained region. This  
174 provided a way quantitate the number of cells that successfully underwent the process of *in vitro*  
175 myogenesis. P38 $\alpha/\beta$  inhibition by LY2228820 and GW856553X (Iosmapimod) did not impact  
176 differentiation of myoblasts into skeletal muscle myotubes. Treated cells fused properly at all  
177 tested drug concentrations to levels comparable to the DMSO control (Figure 3A).

178 We also further assessed gene expression changes in FSHD myotubes upon p38 $\alpha/\beta$  inhibition.  
179 We performed RNA-seq analysis of FSHD and WT myotubes after four days of treatment with

180 vehicle or p38 $\alpha$ / $\beta$  inhibitors. Inhibition of the p38 signaling pathway during differentiation did not  
181 induce significant transcriptome changes, and resulted in less than 100 differentially expressed  
182 genes ( $\text{abs(FC)} > 4$ ;  $\text{FDR} < 0.001$ ). Around 80% of these differentially expressed genes were known  
183 DUX4-regulated transcripts and were all downregulated after p38  $\alpha$  and  $\beta$  inhibition (Figure 3B).  
184 This set of DUX4-regulated genes overlapped significantly with genes upregulated in FSHD  
185 patient muscle biopsies (Wang et al., 2018). Moreover, key driver genes of myogenic programs  
186 such as *MYOG*, *MEF* and *PAX* genes and markers of differentiation such as myosin subunits and  
187 sarcomere proteins were not affected by p38 inhibition (Figure 3C).

### 188 **Inhibition of DUX4 expression results in the reduction of cell death in FSHD myotubes**

189 DUX4 activation and downstream DUX4-regulated target gene expression in muscle cells is toxic,  
190 leading to oxidative stress, changes in sarcomere organization, and apoptosis, culminating in  
191 reduced contractility, and muscle tissue replacement by fat (Block et al., 2013; Bosnakovski et  
192 al., 2014; Choi et al., 2016; Homma et al., 2015; Rickard et al., 2015; Tawil et al., 2014). In  
193 particular, apoptotic cells have been detected in skeletal muscle of FSHD patients supporting the  
194 hypothesis that programmed cell death is caused by aberrant DUX4 expression and contributes  
195 to FSHD pathology (Sandri et al., 2001; Statland et al., 2015). To test this hypothesis *in vitro*, we  
196 evaluated the effect of p38 $\alpha$ / $\beta$  inhibition on apoptosis in FSHD myotubes. We used an antibody  
197 recognizing caspase-3 cleavage products by immunofluorescence to quantify changes in the  
198 activation of programmed cell death. Cleavage of caspase-3 is a major step in the execution of  
199 the apoptosis signaling pathway, leading to the final proteolytic steps that result in cell death (Dix  
200 et al., 2008; Fuentes-Prior and Salvesen, 2004; Mahrus et al., 2008). We detected activated  
201 caspase-3 in FSHD but not in wild-type myotubes and observed a stochastic pattern of expression  
202 of DUX4 in FSHD as previously reported (Figure 4A) (van den Heuvel et al., 2018; Jones et al.,  
203 2012; Snider et al., 2010). Levels of cleaved caspase-3 were reduced in a concentration-  
204 dependent manner with an  $\text{IC}_{50}$  similar to what we observed for inhibition of the p38 pathway and

205 DUX4 expression (Figure 4B). Moreover, we measured SLC34A2, a DUX4 target gene product  
206 using a similar immunofluorescence assay (Figure 3B). This protein was expressed in a similar  
207 stochastic pattern observed for active caspase-3 and its expression was also reduced by p38 $\alpha$ / $\beta$   
208 inhibition (Figure 4B and C). Our results demonstrate that DUX4 inhibition in FSHD myotubes  
209 results in a significant reduction of apoptosis.

### 210 **p38 $\alpha$ and $\beta$ inhibition results in downregulation of DUX4 expression and suppression of** 211 **cell death across multiple FSHD1 and FSHD2 genotypes**

212 FSHD is caused by the loss of repression at the *D4Z4* locus leading to DUX4 expression in  
213 skeletal muscle due to the contraction in the *D4Z4* repeat arrays in chromosome 4 or by mutations  
214 in *SMCHD1* and other modifiers such as *DNMT3B*. Primary FSHD myotubes were used to study  
215 the *in vitro* efficacy of p38 $\alpha$ / $\beta$  inhibitors across different genotypes. We tested eight FSHD1  
216 primary myoblasts with 2-7 *D4Z4* repeat units and three FSHD2 cell lines with characterized  
217 *SMCHD1* mutations. Upon differentiation, the primary cells tested expressed a wide range of  
218 *MBD3L2* levels (Figure 5A, number of *D4Z4* repeat units or *SMCHD1* mutation indicated in  
219 parenthesis), comparable to what we and others have observed in other FSHD myotubes (Jones  
220 et al., 2012). However, we observed significant inhibition of the DUX4 program expression  
221 following treatment with multiple p38 $\alpha$ / $\beta$  inhibitors in all primary myotubes tested from FSHD1 and  
222 FSHD2 patients (Figure 5B). Furthermore, this reduction in the DUX4 program resulted in  
223 concomitant reduction of cleaved caspase-3 (Figure 5C) without any measurable effects on  
224 myotube differentiation (Figure 5D). Our results suggest that the p38 $\alpha$ / $\beta$  pathway critically  
225 regulates the activation of DUX4 independently of the mutation driving its expression in FSHD  
226 muscle cells.

## 227 DISCUSSION

228 Recent studies have advanced our understanding of the mechanisms that normally lead to the  
229 establishment and maintenance of repressive chromatin at the *D4Z4* repeats. Similar to other  
230 repetitive elements in somatic cells, chromatin at this locus is decorated by DNA methylation and  
231 other histone modifications associated with gene silencing, such as H3K27me3 and H3K9me3  
232 (Cabianca et al., 2011; Huichalaf et al., 2014; van Overveld et al., 2003; van den Boogaard et al.,  
233 2016; Zeng et al., 2009). Factors involved in the deposition of these modifications like *SMCHD1*  
234 and *DNMT3B* have been identified by genetic analysis of affected FSHD populations (Calandra  
235 et al., 2016; Lemmers et al., 2012; van den Boogaard et al., 2016). Other factors like NuRD and  
236 CAF1 have been identified by biochemical approaches isolating proteins that associate with the  
237 *D4Z4* locus (Campbell et al., 2018). However, sequence-specific transcriptional activators of  
238 *DUX4* have remained elusive not only in skeletal muscle but also in the regulation of *DUX4* in the  
239 developing embryo, where this factor is normally expressed. Because of the effects of expression  
240 of *DUX4* in FSHD and the apparent tissue specific expression of *DUX4* in skeletal muscle, it has  
241 been hypothesized that myogenic regulatory elements upstream of the *D4Z4* repeats regulate  
242 the expression of *DUX4* in FSHD (Himeda et al., 2014), yet this finding has not led to the  
243 identification of other factors that can specifically activate *DUX4*.

244 In this study, by modelling FSHD *in vitro* and screening a library of probe molecules, we identified  
245 p38 $\alpha$  as a novel activator of *DUX4* expression in patient-derived FSHD cells. This signaling  
246 kinase directly phosphorylates transcription factors involved in myogenesis and may signal  
247 directly to activate *DUX4* expression in differentiating myoblasts. Using highly selective and potent  
248 small molecules extensively characterized previously, we have studied the pharmacological  
249 relationships between the inhibition of this signaling pathway and the inhibition of the expression  
250 of *DUX4*, its downstream gene program expression and its consequences in muscle cells from  
251 FSHD patients. These relationships are maintained across multiple FSHD genotypes, including

252 FSHD1 and FSHD2, indicating that this mechanism acts independent of the genetic lesion present  
253 in these patients. Our studies show a specific effect of p38  $\alpha$  and  $\beta$  inhibition in downregulation of  
254 the DUX4 program and normalization of gene expression compared to cells from healthy donors.  
255 Notably, no effects in differentiation were detected at the tested concentrations of p38 inhibitor.

256 Other recent efforts to identify targets for the treatment of FSHD have reported similar studies in  
257 which the investigators followed the expression of *MBD3L2* as a readout for DUX4 expression or  
258 by using a reporter driven by the activity of DUX4 in immortalized FSHD myotubes *in vitro*  
259 (Campbell et al., 2017; Cruz et al., 2018). Our results have reproduced their identification of  $\beta$ -  
260 adrenergic agonists and BET inhibitors as inhibitors of DUX4 expression. However, these  
261 molecules also caused downregulation of the transcription factor *MYOG* expression or affected  
262 myoblasts fusion at concentrations similar to the half maximal inhibitory concentration for DUX4  
263 expression inhibition in our model (Figure S1B, lack of fusion indicated by arrow).

264 In previous clinical studies in non-FSHD indications under an anti-inflammatory therapeutic  
265 hypothesis, many p38  $\alpha/\beta$  inhibitors were tested extensively and shown to be safe and tolerable,  
266 however they never met efficacy endpoints including in diseases such as rheumatoid arthritis,  
267 chronic obstructive pulmonary disease and acute coronary syndrome (Barbour et al., 2013;  
268 Damjanov et al., 2009; Hammaker and Firestein, 2010; Hill et al., 2008; MacNee et al., 2013;  
269 Norman, 2015; Patnaik et al., 2016). Here, we present evidence from *in vitro* studies that support  
270 the therapeutic hypothesis of treatment of FSHD at its root cause, prevention or reduction of  
271 aberrant expression of DUX4, via inhibition of p38  $\alpha/\beta$ .

272 **FIGURES**

273 **Figure 1. Description of an assay for the identification of inhibitors of DUX4 expression.**

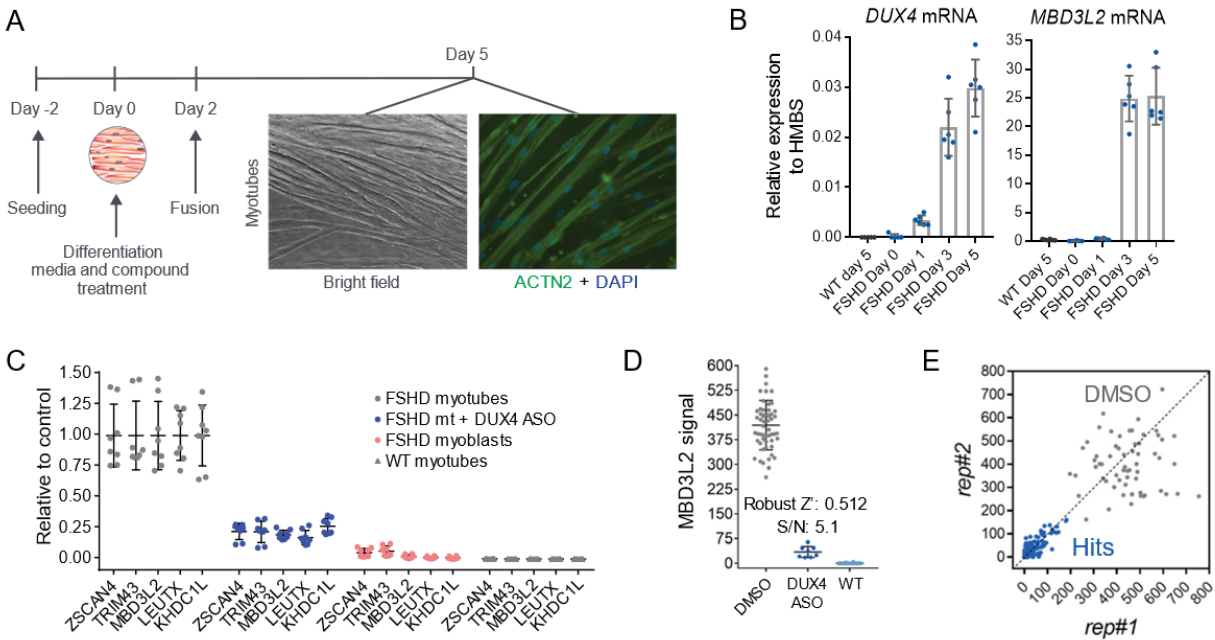

274

275 **(A)** Schematic describing the cellular assay used to identify small molecules that result in the  
 276 inhibition of DUX4 expression and activity. In short, immortalized FSHD myoblasts (C6, 6.5 D4Z4  
 277 RUs) were seeded in 96-well plates 2 days before differentiation was induced. After myoblasts  
 278 reached confluence, media was replaced and compounds for treatment were added. At day 2,  
 279 fusion was observed and at day 5, differentiated myotubes were harvested for gene expression  
 280 analysis or fixed for immunostaining. Representative image of the alpha-actinin staining in  
 281 differentiated myotubes. **(B)** DUX4 expression is rapidly induced after differentiation of  
 282 immortalized FSHD myotubes *in vitro*. To measure DUX4 transcript, C6 FSHD myotubes were  
 283 grown in 12-well plates similarly to A, cells were harvest on day 5 for RNA extraction. RT-qPCR  
 284 was used to determine expression of *DUX4* mRNA and its downstream gene *MBD3L2*  
 285 (normalized using *HMBS* as housekeeping). These transcripts were not detected in wild-type  
 286 immortalized myotubes derived from healthy volunteers. **(C)** Canonical DUX4 target genes are

287 specifically detected in FSHD myotubes and are downregulated when *DUX4* is knocked down  
288 using a specific antisense oligonucleotide (ASO). RT-qPCR analysis was used to detect  
289 expression in immortalized myoblasts/myotubes. ASO knockdown in FSHD myotubes (mt) was  
290 carried out during the 5 days of differentiation. Bars indicate mean $\pm$ SD. **(D)** A 96-well plate cell-  
291 based assay was optimized to screen for inhibitors of DUX4 expression. An assay measuring  
292 *MBD3L2* by RT-qPCR was selected because of robust separation and specificity reporting DUX4  
293 activity. *MBD3L2* signal was normalized using *POLR2A* as a housekeeping gene. Bars indicate  
294 mean $\pm$ SD. **(E)** Hits identified in small molecule screen potently reduced the activity of DUX4. X  
295 and Y axis show the normalized *MBD3L2* signal obtained from the two replicate wells analyzed.

296

297 **Figure 2. Small molecule inhibitors of p38 alpha reduced expression of DUX4 in FSHD**  
 298 **myotubes.**

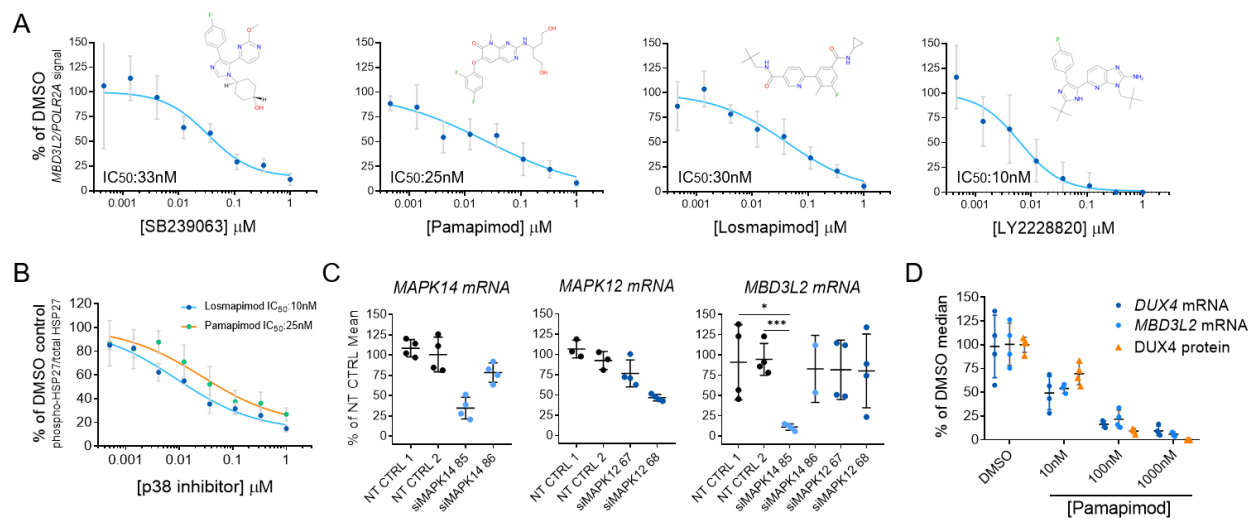

299

300 **(A)** Diverse inhibitors of p38 $\alpha/\beta$  reduce the expression of *MBD3L2* in differentiating FSHD  
 301 myotubes. Concentration-dependent responses were observed with all tested inhibitors. Four  
 302 replicates per concentration were tested to measure reduction of *MBD3L2* in immortalized C6  
 303 FSHD myotubes and bars indicate mean $\pm$ SD. **(B)** P38 $\alpha/\beta$  pathway inhibition in C6 FSHD  
 304 myotubes. The ratio between phosphorylated HSP27 to total HSP27 was measured by an  
 305 immunoassay (MSD) after 12h of treatment of C6 FSHD myotubes with the indicated inhibitors.  
 306 Half maximal inhibitory concentrations (IC<sub>50</sub>) observed for p-HSP27 were comparable to those  
 307 obtained for reduction of *MBD3L2* expression. Bars indicate mean $\pm$ SD for four replicate wells. **(C)**  
 308 Knockdown of p38 $\alpha$  (*MAPK14*) results in reduction of *MBD3L2* expression. Immortalized C6  
 309 myoblasts were electroporated with siRNAs specific for *MAPK14* (p38 $\alpha$ ) and *MAPK12* (p38 $\beta$ )  
 310 plated and differentiated for 3 days. Expression of the indicated transcripts was measured using  
 311 RT-qPCR and normalized against *POLR2A*. Reduction of *MBD3L2* expression was observed  
 312 when >50% knockdown of *MAPK14* was achieved. Bars indicate mean $\pm$ SD. **(D)** P38 $\alpha/\beta$  inhibition  
 313 results in the reduction of DUX4 expression. After inhibition, correlated reduction of *DUX4* mRNA,  
 314 protein and downstream gene *MBD3L2* was observed. To measure DUX4 protein a novel  
 315 immunoassay was developed using previously described antibodies (see methods and Figure  
 316 S4). Bars indicate mean $\pm$ SD, t-test p value \* <0.01, \*\*\* 0.0002

317



318 **Figure 3. Inhibition of the p38 $\alpha/\beta$  pathway results in normalized gene expression in FSHD**  
 319 **myotubes without affecting the differentiation process *in vitro***

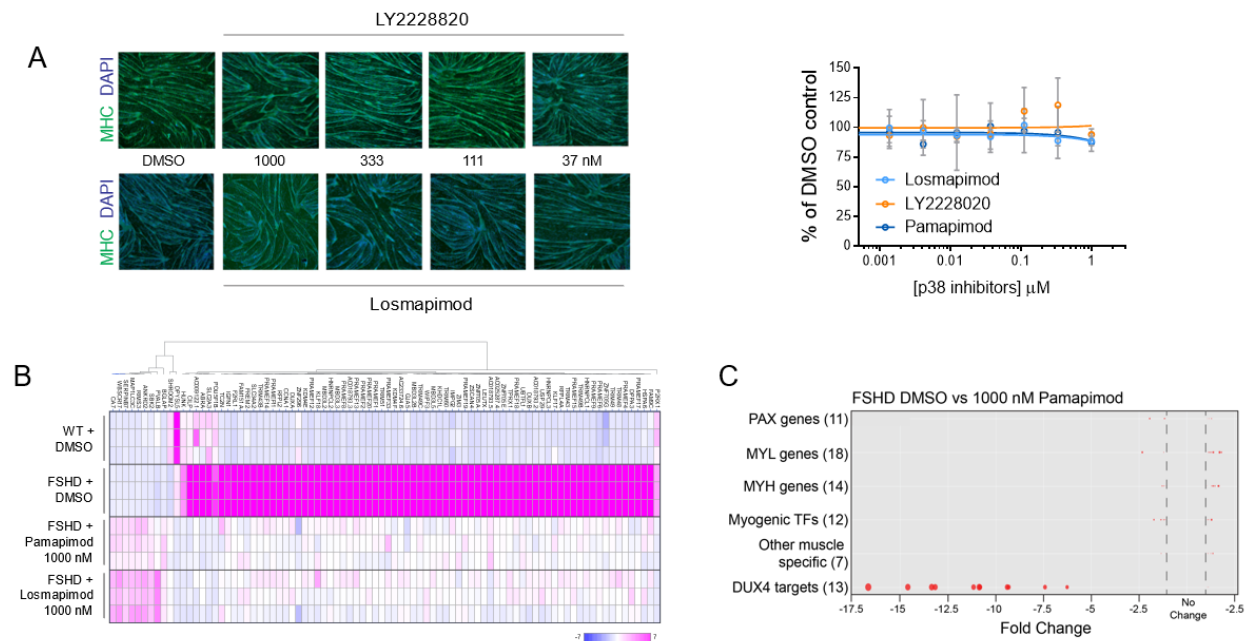

320

321

322 **(A)** Quantification of myotube differentiation after p38 $\alpha/\beta$  inhibition. Two inhibitors were used to  
 323 demonstrate the effects of p38 $\alpha/\beta$  inhibition in a high-content imaging assay to quantify the  
 324 number of nuclei that properly underwent differentiation by activation of expression of myofiber  
 325 specific proteins (i.e. MHC). No changes were observed in the morphology of C6 myotubes  
 326 treated for 5 days. Bars indicate mean $\pm$ SD. **(B)** Heat map representing fold change of expression  
 327 levels of differentially expressed genes after p38 $\alpha/\beta$  inhibition in FSHD myotubes for 5 days. 86  
 328 genes showed significant changes in expression after treatment with two different inhibitors  
 329 ( $abs(FC)>4$ ;  $FDR<0.001$ ). Each condition was tested in triplicate represented as rows in the  
 330 heatmap **(C)** DUX4 target genes are specifically downregulated by p38 inhibition. X-axis indicates  
 331 the fold changes observed in members of the gene families indicated. Diameter of dots represent  
 332 p-value.

333

334 **Figure 4. Inhibition of the p38 $\alpha/\beta$  pathway reduced the activation of programmed cell death**  
335 **in differentiating FSHD myotubes.**

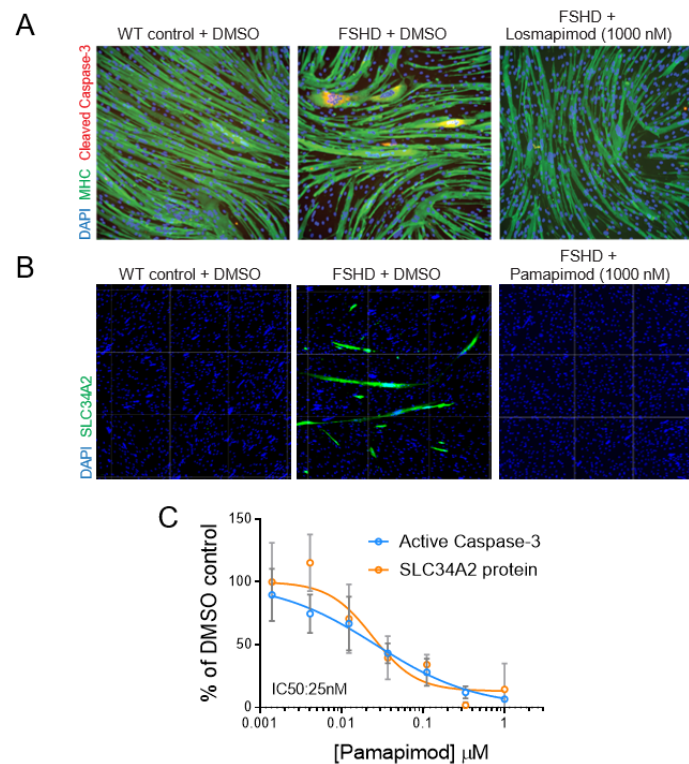

336

337

338 **(A)** A high-content imaging assay was developed to measure cleaved caspase-3 in differentiating  
339 myotubes. C6 FSHD myotubes were differentiated and treated for 5 days as indicated above and  
340 stained to measure MHC, cleaved-caspase-3 and nuclei. Representative images show that  
341 cleaved caspase-3 was only detected in FSHD myotubes, not in wild-type controls or after  
342 inhibition of the p38 pathway. Six replicates were imaged and cleaved caspase-3 signal under  
343 MHC staining was quantified. **(B)** Stochastic expression of DUX4 target gene, *SLC34A2*, in C6  
344 FSHD myotubes. Expression of *SLC34A2* was measured by immunostaining in similar conditions  
345 as image above. No expression was detected in wild-type control or p38 inhibitor-treated  
346 myotubes. Signal of *SLC34A2* under MHC staining was quantified in two replicates **(C)**  
347 Concentration-dependent inhibition of the expression of DUX4 target genes is highly correlated  
348 to the inhibition of programmed cell death in C6 myotubes. Bars indicate mean $\pm$ SD.

349

350 **Figure 5. p38 $\alpha/\beta$  inhibition results in the reduction of DUX4 activity and cell death across**  
 351 **a variety of genotypes of FSHD1 and FSHD2 primary myotubes.**

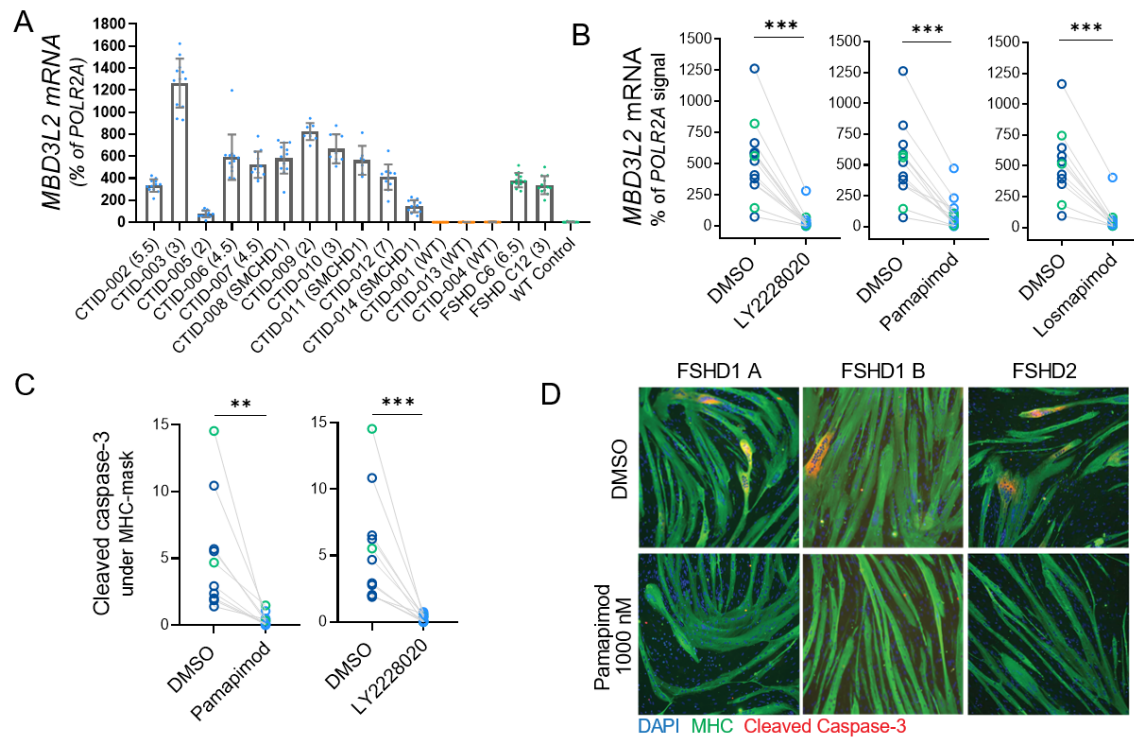

352

353 **(A)** Levels of *MBD3L2* expression across different primary and immortalized myotubes  
 354 determined RT-qPCR. DUX4 activity is only detected in FSHD1/2 lines after 4 days of  
 355 differentiation. Bars indicate mean $\pm$ SD and repeat number is indicated in parenthesis in FSHD1  
 356 lines and SMCHD1 mutation for FSHD2 lines used. **(B)** Inhibition of the p38 $\alpha/\beta$  pathway results  
 357 in potent reduction of *MBD3L2* expression activation across the entire set of FSHD primary cells  
 358 tested. Three different inhibitors were used, and each circle indicates a different FSHD cell line  
 359 tested. FSHD1 in blue and FSHD2 in green. Expression levels were measured by RT-qPCR in  
 360 six replicates. **(C and D)** p38 $\alpha/\beta$  pathway inhibition reduces activation of programmed cell death  
 361 across primary FSHD cell lines with different genotypes. Stochastic activation of caspase-3 in a  
 362 small number of FSHD myotubes was detected by immunostaining and quantified in all lines. Six  
 363 replicates were used to quantify signal of cleaved caspase-3 under MHC stained myotubes.  
 364 Wilconox test, P value \*\*0.002, \*\*\*0.0002.

365

366 **Figure S1.**

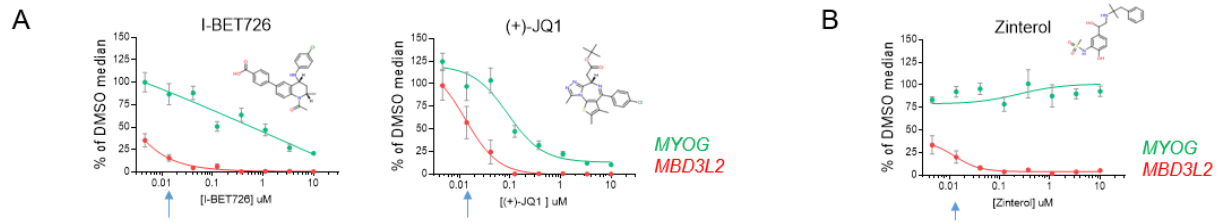

367

368 Bromodomain containing proteins inhibitors (A) and  $\beta$ -adrenergic agonist reduced the expression  
369 of *MBD3L2* in a concentration dependent manner as previously described (Campbell et al., 2017).  
370 Arrow indicates concentration at which effects in differentiation started to be observed by visual  
371 inspection.

372

373 **Figure S2.**

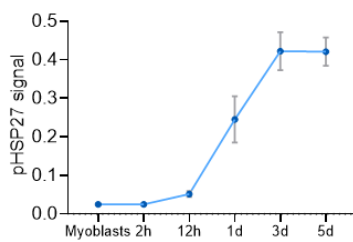

374

375 Levels of phosphorylated-HSP27 increase during myogenic differentiation in C6 FSHD myotubes.

376

377 **Figure S3.**

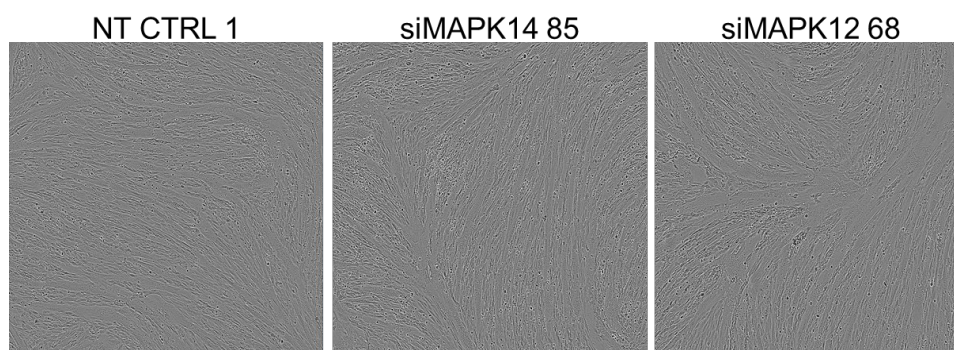

378

379 Differentiation of C6 FSHD myotubes was not affected by MAPK12 and MAPK14 partial  
380 knockdown that resulted in *MBD3L2* level reduction.

381

382 **Figure S4.**

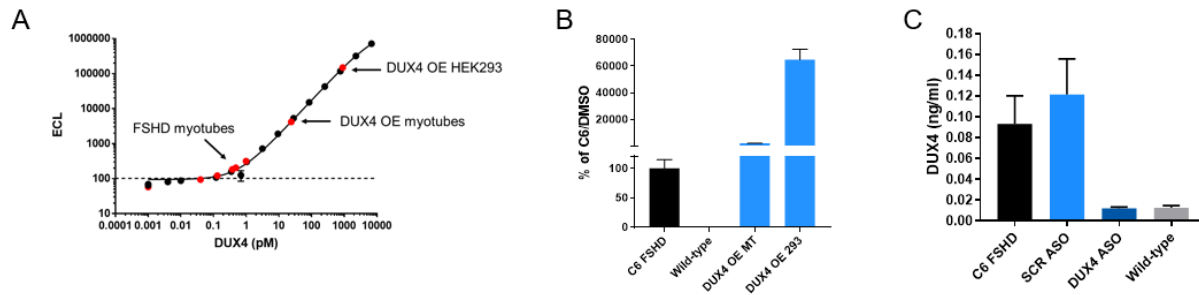

383

384 Specific detection of DUX4 protein in mesoscale electro-chemiluminescent immunoassay (A)  
385 Recombinant GST-DUX4 calibrator curve. (B) C6 FSHD or wild type 5-day differentiated  
386 myotubes, DUX4 overexpressed 1-day differentiated myotubes infected with DUX4 bacmam,  
387 DUX4 overexpressed in 293 cells transfected with CMV-DUX4 plasmid. (C) C6 FSHD myotubes  
388 treated with scrambled or DUX4 anti-sense oligonucleotide or wild type control.

389





391 **Graphical Abstract**

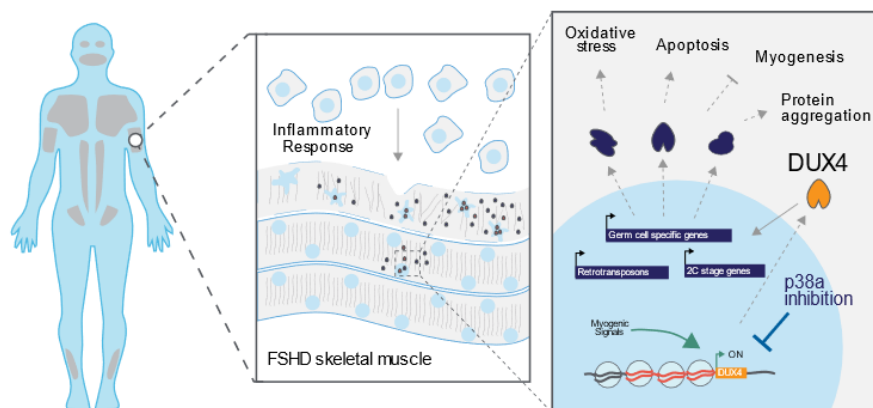

392

393

## 394 **MATERIALS AND METHODS**

### 395 **Cell lines and cell culture**

396 Immortalized myoblasts from FSHD (AB1080FSHD26 C6) and healthy individuals  
397 (AB1167C20FL) were generated and obtained from the Institut Myologie, France. In short,  
398 primary myoblast cultures were obtained from patient samples and immortalized by  
399 overexpression of TERT and CDK4 (Krom et al., 2012). Primary myoblasts were isolated from  
400 FSHD muscle biopsies and were obtained from University of Rochester.

401 Immortalized myoblasts were expanded on gelatin-coated dishes (EMD Millipore, #ES-006-B)  
402 using Skeletal muscle cell growth media (Promocell, #C-23060) supplemented with 15% FBS  
403 (ThermoFisher, #16000044). Primary myoblasts were also expanded on gelatin-coated plates but  
404 using media containing Ham's F10 Nutrient Mix (ThermoFisher, #11550043), 20% FBS and 0.5%  
405 Chicken embryo extract (Gemini Bio-product, #100-163P). For differentiation, immortalized or  
406 primary myoblasts were grown to confluency in matrigel-coated plates (Corning, #356234) and  
407 growth media was exchanged for differentiation media (Brainbits, #Nb4-500) after a PBS wash.  
408 DMSO (vehicle) or compounds (previously dissolved in DMSO at 10 mM stock concentrations)  
409 were added at the desired concentration at the time differentiation media was exchanged and  
410 maintained in the plates until harvesting or analysis.

### 411 **Small molecule compounds and antisense oligonucleotides**

412 SB239063, Pamapimod, LY2228820 and Losmapimod were purchased from Selleck Chem  
413 (#S7741, S8125, S1494 and S7215). 10 mM stock solutions in DMSO were maintained at room  
414 temperature away from light. DUX4 antisense oligonucleotides (gapmer) were purchased from  
415 QIAGEN and were designed to target exon 3 of DUX4. The lyophilized oligos were resuspended  
416 in PBS at 25 mM final concentration and kept frozen at -20°C until used. This antisense

417 oligonucleotide was added to cells in growth media 2 days before differentiation and maintained  
418 during the differentiation process until harvesting.

#### 419 **Detection of DUX4 and target gene expression by RT-qPCR**

420 RNA from myotubes was isolated from C6 FSHD cells differentiated in 6-well plates using 400  $\mu$ l  
421 of tri-reagent and transfer to Qiagen qiashredder column (cat#79656). An equal amount of 100%  
422 Ethanol was added to flow through and transferred to a Direct-zol micro column (Zymo research  
423 cat# 2061) and the manufacturers protocol including on-column DNA digestion was followed. RNA  
424 (1  $\mu$ g) was converted to cDNA using Superscript IV priming with oligo-dT (Thermofisher cat#  
425 18091050). Pre-amplification of DUX4 and housekeeping gene *HMBS* was performed using  
426 preamp master mix (Thermofisher cat#4384267) as well as 0.2X diluted taqman assays (IDT  
427 DUX4 custom; forward Forward: 5'-GCCGGCCCAGGTACCA-3', Reverse: 5'-  
428 CAGCGAGCTCCCTTGCA-3', and Probe: 5'-/56-FAM/CAGTGCGCA/ZEN/CCCCG/3IABkFQ/-3';  
429 and *HMBS* HS00609297m1-VIC). After 10 cycles of pre-amplification, reactions were diluted 5-  
430 fold in nuclease-free water and qPCR was performed using taqman multiplex master mix  
431 (Thermofisher cat#4461882).

432 To measure DUX4 target gene expression in a 96-well plate format, cells were lysed into 25  $\mu$ L  
433 Realtime Ready lysis buffer (Roche, #07248431001) containing 1% RNase inhibitor (Roche,  
434 #03335399001) and 1% DNase I (ThermoFisher, #AM2222) for 10 min while shaking on a  
435 vibration platform shaker (Titramax 1000) at 1200 rpm. After homogenization, lysates were frozen  
436 at -80°C for at least 30 min and thawed on ice. Lysates were diluted to 100  $\mu$ L using RNase-free  
437 water. 1  $\mu$ L of this reaction was used for reverse transcription and preamplification of cDNA in a  
438 5  $\mu$ L one-step reaction using the RT enzyme from Taqman RNA-to-Ct (ThermoFisher, #4392938)  
439 and the Taqman Preamp Master Mix (ThermoFisher, #4391128) according to manufacturer's  
440 specifications. This preamplification reaction was diluted 1:4 using nuclease-free water, 1 $\mu$ L of  
441 this reaction was used as input for a 5  $\mu$ L qPCR reaction using the Taqman Multiplex Master Mix

442 (ThermoFisher, #4484262). Amplification was detected in a Quantstudio 7 Flex instrument from  
443 ThermoFisher. The following Taqman probes were purchased from ThermoFisher; MBD3L2  
444 Taqman Assay (ThermoFisher, Hs00544743\_m1, FAM-MGB). ZSCAN4 Taqman Assay  
445 (ThermoFisher, Hs00537549\_m1, FAM-MGB). LEUTX Taqman Assay (Thermo Fisher,  
446 Hs01028718\_m1, FAM-MGB). TRIM43 Taqman Assay (ThermoFisher, Hs00299174\_m1, FAM-  
447 MGB). KHDC1L Taqman Assay (ThermoFisher, Hs01024323\_g1, FAM-MGB). POLR2A Taqman  
448 Assay (ThermoFisher, Hs00172187\_m1, VIC-MGB).

#### 449 **Detection of HSP27 by Electrochemiluminescence**

450 Total and phosphorylated HSP27 was measured using a commercial MesoScale Discovery  
451 assay, Phospho (Ser82)/Total HSP27 Whole Cell Lysate Kit (MesoScale Discovery, # K15144D).  
452 Myotubes were grown in 96-well plates using conditions described above and were lysed using  
453 25  $\mu$ L of 1X MSD lysis buffer with protease and phosphatase inhibitors. The lysates were  
454 incubated at room temp for 10 minutes with shaking at 1200 rpm using Titramax 1000. Lysates  
455 were stored at -80  $^{\circ}$ C until all timepoints were collected. Lysates were then thawed on ice and 2  
456  $\mu$ L were used to perform a BCA protein assay (ThermoFisher, # 23225). 10  $\mu$ L of lysate were  
457 diluted 1:1 in 1X MSD lysis buffer and added to the 96-well Mesoscale assay plate. Manufacturer  
458 instructions were followed, and data was obtained using a MesoScale Discovery SECTOR S 600  
459 instrument.

#### 460 **Myotube nuclei isolation and detection of DUX4 by Electrochemiluminescence**

461 DUX4 was measured using a novel MesoScale Discovery assay developed at Fulcrum  
462 Therapeutics. Anti-DUX4 monoclonal capture antibody (clone P2B1) was coated overnight at 5  
463  $\mu$ g/ml in 0.1 M sodium Bicarbonate pH=8.4 onto a Mesoscale 384 well plate (L21XA). The plate  
464 was blocked with 5% BSA/PBS for at least 2 hours. Human FSHD myotubes grown in 100 mm  
465 plates in the conditions described above were harvested 4 days post differentiation using TrypLE

466 express solution (Gibco, #12605-010), neutralized with growth media and the myotubes were  
467 pelleted by centrifugation. Myotubes were resuspended in ice cold nuclei extraction buffer (320  
468 mM Sucrose, 5 mM MgCl<sub>2</sub>, 10 mM HEPES, 1% Triton X-100 at pH=7.4). Nuclei were pelleted by  
469 centrifugation at 2000 xg for 4 minutes at 4°C. Nuclei were resuspended in ice cold wash buffer  
470 (320 mM Sucrose, 5 mM MgCl<sub>2</sub>, 10 mM HEPES at pH=7.4) and pelleted by centrifugation at 2000  
471 xg for 4 minutes at 4°C. Nuclei were suspended in 150 µl of RIPA buffer at 4°C (+150 mM NaCl).  
472 Extracts were diluted 1:1 with assay buffer and 10 µl per well was added to 384 well pre-  
473 coated/blocked MSD plate and incubated for 2 hours. Anti-DUX4-Sulfo Conjugate (clone E5-5)  
474 was added to each well and incubated for two hours. Plates were washed and 40 µl per well of  
475 1X Read T buffer was added. Data was obtained using a MesoScale Discovery SECTOR S 600  
476 instrument.

477 **Quantitative Immunofluorescent detection of Myosin Heavy Chain, SLC34A2 and cleaved**  
478 **Caspase-3**

479 Myotubes were grown and treated as described above. At day 5 after differentiation was induced,  
480 cells were fixed using 4% paraformaldehyde in PBS during 10 min at room temperature. Fixative  
481 was washed, and cells were permeabilized using 0.5% Triton X-100 during 10 min at room  
482 temperature. After washing, fixing and permeabilizing, the cells were blocked using 5% donkey  
483 serum in PBS/0.05% Tween 20 during 1 h at room temperature. Primary antibodies against MHC  
484 (MF20, R&D systems, #MAB4470), SLC34A2 (Cell signaling, #66445) and active Caspase-3 (Cell  
485 signaling, #9661) were diluted 1:500 in PBS containing 0.1% Triton X-100 and 5% donkey serum  
486 and incubated with cells for 1 h at room temperature. After 4 washes, secondary antibodies were  
487 added (ThermoFisher, #A32723 and # R37117) in a 1:2000 dilution and incubated during 1 h at  
488 room temperature. During the last 5 min of incubation a 1:2000 dilution of DAPI was added before  
489 proceeding with final washes and imaging. Images were collected using the CellInsight CX7  
490 (ThermoFisher). Images were quantified using HCS Studio Software. Differentiation was

491 quantified by counting the percentage of nuclei in cells expressing MHC from the total of the well.  
492 SLC34A2 and active Caspase-3 signal was quantified by colocalization of cytoplasmic cleaved  
493 Caspase-3 within MHC expressing cells.

#### 494 **Knockdown of MAPK12 and MAPK14 in FSHD myotubes**

495 Exponentially dividing immortalized C6 FSHD myoblasts were harvested and counted. 50000  
496 myoblasts were electroporated using a 10  $\mu$ L tip in a Neon electroporation system  
497 (ThermoFisher). Conditions used were determined to preserve viability and achieved maximal  
498 electroporation (Pulse V=1100V, pulse width=40 and pulse #=1). After electroporation, cells were  
499 plated in growth media and media was changed for differentiation 24h after. 3 days after  
500 differentiation, cells were harvested and analyzed for KD and effects in *MBD3L2* using the RT-  
501 qPCR assay described before. siRNAs used were obtained from ThermoFisher (4390843,  
502 4390846, s3585, s3586, s12467, s12468).

#### 503 **Gene expression analysis by RNA-seq**

504 RNA from myotubes grown in 6-well plates in conditions described above was isolated using the  
505 RNeasy Micro Kit from Qiagen (#74004). Quality of RNA was assessed by using a Bioanalyzer  
506 2100 and samples were submitted for library preparation and deep sequencing to the Molecular  
507 biology core facility at the Dana Farber Cancer Institute. After sequencing, raw reads of fastq files  
508 from all samples were mapped to hg38 genome assemblies using ArrayStudio aligner. Raw read  
509 count and FPKM were calculated for all the genes, and DESeq2 was applied to calculate  
510 differentially expressed genes using general linear model (GLM). Statistical cutoff of absolute fold  
511 change ( $\text{abs}(\text{FC}) > 4$ ,  $\text{FDR} < 0.001$ ) were applied to identify differentially expressed protein coding  
512 genes. (DATA DEPOSITION INFO TBD)

513

514 **ACKNOWLEDGEMENTS**

515 We thank Peter Jones, Takako Jones and Charis Himeda from the University of Reno for technical  
516 advice and guidance during the development of assays in this manuscript and insightful  
517 discussions about the regulation of DUX4 expression. Peter Jones for providing us with constructs  
518 for DUX4 overexpression used to validate our DUX4 protein detection assay. Vincent Mouly  
519 (Institut Myologie) and Silvère Van der Maarel (LUMC) for providing access to immortalized  
520 myoblasts lines. In addition, the authors would like to thank members of Fulcrum Therapeutics for  
521 helpful discussions throughout the project. We would also like to thank patients participating in  
522 previous studies that have provided tissues to generate cell lines used in this manuscript.

523

524 **REFERENCES**

- 525
- 526 Barbour, A.M., Sarov-Blat, L., Cai, G., Fossler, M.J., Sprecher, D.L., Graggaber, J., McGeoch,  
527 A.T., Maison, J., and Cheriyan, J. (2013). Safety, tolerability, pharmacokinetics and  
528 pharmacodynamics of losmapimod following a single intravenous or oral dose in healthy  
529 volunteers. *Brit J Clin Pharmacol* 76, 99–106.
- 530
- 531 Block, G.J., Narayanan, D., Amell, A.M., Petek, L.M., Davidson, K.C., Bird, T.D., Tawil, R.,  
532 Moon, R.T., and Miller, D.G. (2013). Wnt/ $\beta$ -catenin signaling suppresses DUX4 expression and  
533 prevents apoptosis of FSHD muscle cells. *Human Molecular Genetics* 22, 4661–4672.
- 534
- 535 van den Boogaard, M.L., Lemmers, R., Camaño, P., van der Vliet, P.J., Voermans, N., van  
536 Engelen, B.G., de Munain, A., Tapscott, S.J., van der Stoep, N., Tawil, R., et al. (2015). Double  
537 SMCHD1 variants in FSHD2: the synergistic effect of two SMCHD1 variants on D4Z4  
538 hypomethylation and disease penetrance in FSHD2. *Eur J Hum Genet* 24, 78–85.
- 539
- 540 Bosnakovski, D., Choi, S., Jasser, J., Toso, E.A., Walters, M.A., and Kyba, M. (2014). High-  
541 throughput screening identifies inhibitors of DUX4-induced myoblast toxicity. *Skeletal Muscle* 4,  
542 1–11.
- 543
- 544 Brewer, G.J., Boehler, M.D., Jones, T.T., and Wheeler, B.C. (2008). NbActiv4 medium  
545 improvement to Neurobasal/B27 increases neuron synapse densities and network spike rates  
546 on multielectrode arrays. *Journal of Neuroscience Methods* 170, 181–187.
- 547
- 548 Cabianca, D.S., Casa, V., Bodega, B., Xynos, A., Ginelli, E., Tanaka, Y., and Gabellini, D.  
549 (2011). A Long ncRNA Links Copy Number Variation to a Polycomb/Trithorax Epigenetic Switch  
550 in FSHD Muscular Dystrophy. *Cell* 149, 819–831.
- 551
- 552 Calandra, P., Cascino, I., Lemmers, R.J., Galluzzi, G., Teveroni, E., Monforte, M., Tasca, G.,  
553 Ricci, E., Moretti, F., van der Maarel, S.M., et al. (2016). Allele-specific DNA hypomethylation  
554 characterises FSHD1 and FSHD2. *J Med Genet* 53, 348.
- 555
- 556 Campbell, A.E., Oliva, J., Yates, M.P., Zhong, J., Shadle, S.C., Snider, L., Singh, N., Tai, S.,  
557 Hiramuki, Y., Tawil, R., et al. (2017). BET bromodomain inhibitors and agonists of the beta-2



558 adrenergic receptor identified in screens for compounds that inhibit DUX4 expression in FSHD  
559 muscle cells. *Skeletal Muscle* 7, 16.

560

561 Campbell, A.E., Shadle, S.C., Jagannathan, S., Lim, J.-W., Resnick, R., Tawil, R., van der  
562 Maarel, S.M., and Tapscott, S.J. (2018). NuRD and CAF-1-mediated silencing of the D4Z4 array  
563 is modulated by DUX4-induced MBD3L proteins. *Elife* 7, e31023.

564

565 Campbell, R.M., Anderson, B.D., Brooks, N.A., Brooks, H.B., Chan, E.M., Dios, A., Gilmour, R.,  
566 Graff, J.R., Jambrina, E., Mader, M., et al. (2014). Characterization of LY2228820 Dimesylate, a  
567 Potent and Selective Inhibitor of p38 MAPK with Antitumor Activity. *Mol Cancer Ther* 13, 364–  
568 374.

569

570 Chen, K., Dobson, R., Lucet, I., Young, S., Pearce, F., Blewitt, M., and Murphy, J. (2016). The  
571 epigenetic regulator Smchd1 contains a functional GHKL-type ATPase domain. *Biochemical*  
572 *Journal* 473, 1733–1744.

573

574 Choi, S.H., Gearhart, M.D., Cui, Z., Bosnakovski, D., Kim, M., Schennum, N., and Kyba, M.  
575 (2016). DUX4 recruits p300/CBP through its C-terminus and induces global H3K27 acetylation  
576 changes. *Nucleic Acids Research* 44, 5161–5173.

577

578 Coulthard, L.R., White, D.E., Jones, D.L., Mott, M.F., and Burchill, S.A. (2009). p38MAPK:  
579 stress responses from molecular mechanisms to therapeutics. *Trends Mol Med* 15, 369–379.

580

581 Cruz, J.M., Hupper, N., Wilson, L.S., Concannon, J.B., Wang, Y., Oberhauser, B., Patora-  
582 Komisarska, K., Zhang, Y., Glass, D.J., Trendelenburg, A.-U., et al. (2018). Protein kinase A  
583 activation inhibits DUX4 gene expression in myotubes from patients with facioscapulohumeral  
584 muscular dystrophy. *J Biol Chem* 293, 11837–11849.

585

586 Cuenda, A., and Rousseau, S. (2007). p38 MAP-Kinases pathway regulation, function and role  
587 in human diseases. *Biochimica Et Biophysica Acta Bba - Mol Cell Res* 1773, 1358–1375.

588

589 Damjanov, N., Kauffman, R.S., and Spencer-Green, G.T. (2009). Efficacy, pharmacodynamics,  
590 and safety of VX-702, a novel p38 MAPK inhibitor, in rheumatoid arthritis: Results of two  
591 randomized, double-blind, placebo-controlled clinical studies. *Arthritis & Rheumatism* 60, 1232–

592 1241.

593

594 Deenen, J.C., Arnts, H., van der Maarel, S.M., Padberg, G.W., Verschuuren, J.J., Bakker, E.,  
595 Weinreich, S.S., Verbeek, A.L., and van Engelen, B.G. (2014). Population-based incidence and  
596 prevalence of facioscapulohumeral dystrophy. *Neurology* 83, 1056–1059.

597

598 Dion, C., Roche, S., Laberthonnière, C., Broucqsault, N., Mariot, V., Xue, S., Gurzau, A.D.,  
599 Nowak, A., Gordon, C.T., Gaillard, M.-C., et al. (2019). SMCHD1 is involved in de novo  
600 methylation of the DUX4-encoding D4Z4 macrosatellite. *Nucleic Acids Res* 47, gkz005-.

601

602 Dix, M.M., Simon, G.M., and Cravatt, B.F. (2008). Global Mapping of the Topography and  
603 Magnitude of Proteolytic Events in Apoptosis. *Cell* 134, 679–691.

604

605 Fehr, S., Unger, A., Schaeffeler, E., Herrmann, S., Laufer, S., hwab, and Albrecht, W. (2015).  
606 Impact of p38 MAP Kinase Inhibitors on LPS-Induced Release of TNF- $\alpha$  in Whole Blood and  
607 Primary Cells from Different Species. *Cellular Physiology and Biochemistry* 36, 2237–2249.

608

609 Fuentes-Prior, P., and Salvesen, G.S. (2004). The protein structures that shape caspase  
610 activity, specificity, activation and inhibition. *Biochem J* 384, 201–232.

611

612 Geng, L.N., Yao, Z., Snider, L., Fong, A.P., Cech, J.N., Young, J.M., van der Maarel, S.M.,  
613 Ruzzo, W.L., Gentleman, R.C., Tawil, R., et al. (2011). DUX4 Activates Germline Genes,  
614 Retroelements, and Immune Mediators: Implications for Facioscapulohumeral Dystrophy.  
615 *Developmental Cell* 22, 38–51.

616

617 Gordon, C.T., Xue, S., Yigit, G., Filali, H., Chen, K., Rosin, N., Yoshiura, K., Oufadem, M., Beck,  
618 T.J., McGowan, R., et al. (2017). De novo mutations in SMCHD1 cause Bosma arhinia  
619 microphthalmia syndrome and abrogate nasal development. *Nature Genetics*.

620

621 de Greef, J.C., Lemmers, R., van Engelen, B., Sacconi, S., Venance, S.L., Frants, R.R., Tawil,  
622 R., and van der Maarel, S.M. (2009). Common epigenetic changes of D4Z4 in contraction-  
623 dependent and contraction-independent FSHD. *Hum Mutat* 30, 1449–1459.

624

625 Hammaker, D., and Firestein, G. (2010). “Go upstream, young man”: lessons learned from the

626 p38 saga. *Annals of the Rheumatic Diseases* 69, i77–i82.  
627  
628 van den Heuvel, A., Mahfouz, A., Kloet, S.L., Balog, J., van Engelen, B.G., Tawil, R., Tapscott,  
629 S.J., and van der Maarel, S.M. (2018). Single-cell RNA-sequencing in facioscapulohumeral  
630 muscular dystrophy disease etiology and development. *Hum Mol Genet*.  
631  
632 Hill, R.J., Dabbagh, K., Phippard, D., Li, C., Suttman, R.T., Welch, M., Papp, E., Song, K.W.,  
633 Chang, K., Leaffer, D., et al. (2008). Pamapimod, a Novel p38 Mitogen-Activated Protein Kinase  
634 Inhibitor: Preclinical Analysis of Efficacy and Selectivity. *Journal of Pharmacology and*  
635 *Experimental Therapeutics* 327, 610–619.  
636  
637 Himeda, C.L., Debarnot, C., Homma, S., Beermann, M., Miller, J.B., Jones, P.L., and Jones, T.I.  
638 (2014). Myogenic Enhancers Regulate Expression of the Facioscapulohumeral Muscular  
639 Dystrophy-Associated DUX4 Gene. *Mol Cell Biol* 34, 1942–1955.  
640  
641 Himeda, C.L., Jones, T.I., and Jones, P.L. (2015). Facioscapulohumeral Muscular Dystrophy As  
642 a Model for Epigenetic Regulation and Disease. *Antioxid Redox Sign* 22, 1463–1482.  
643  
644 Homma, S., Beermann, M., Boyce, F.M., and Miller, J. (2015). Expression of FSHD-related  
645 DUX4-FL alters proteostasis and induces TDP-43 aggregation. *Ann Clin Transl Neurology* 2,  
646 151–166.  
647  
648 Huichalaf, C., Micheloni, S., Ferri, G., Caccia, R., and Gabellini, D. (2014). DNA Methylation  
649 Analysis of the Macrosatellite Repeat Associated with FSHD Muscular Dystrophy at Single  
650 Nucleotide Level. *PLoS ONE* 9, e115278.  
651  
652 Jagannathan, S., Shadle, S., Resnick, R., Snider, L., Tawil, R.N., van der Maarel, S.M., Bradley,  
653 R.K., and Tapscott, S.J. (2016). Model systems of DUX4 expression recapitulate the  
654 transcriptional profile of FSHD cells. *Human Molecular Genetics*.  
655  
656 Jansz, N., Chen, K., Murphy, J.M., and Blewitt, M.E. (2017). The Epigenetic Regulator SMCHD1  
657 in Development and Disease. *Trends Genet* 33, 233–243.  
658  
659 Jones, T., Chen, J.C., Rahimov, F., Homma, S., Arashiro, P., Beermann, M., King, O.D., Miller,

660 J.B., Kunkel, L.M., Emerson, C.P., et al. (2012). Facioscapulohumeral muscular dystrophy  
661 family studies of DUX4 expression: evidence for disease modifiers and a quantitative model of  
662 pathogenesis. *Human Molecular Genetics* 21, 4419–4430.

663

664 Jones, T.I., Yan, C., Sapp, P.C., McKenna-Yasek, D., Kang, P.B., Quinn, C., Salameh, J.S.,  
665 King, O.D., and Jones, P.L. (2014). Identifying diagnostic DNA methylation profiles for  
666 facioscapulohumeral muscular dystrophy in blood and saliva using bisulfite sequencing. *Clin*  
667 *Epigenetics* 6, 23.

668

669 Jones, T.I., King, O.D., Himeda, C.L., Homma, S., Chen, J.C., Beermann, M., Yan, C.,  
670 Emerson, C.P., Miller, J.B., Wagner, K.R., et al. (2015). Individual epigenetic status of the  
671 pathogenic D4Z4 macrosatellite correlates with disease in facioscapulohumeral muscular  
672 dystrophy. *Clin Epigenetics* 7, 37.

673

674 Keren, A., Tamir, Y., and Bengal, E. (2006). The p38 MAPK signaling pathway: A major  
675 regulator of skeletal muscle development. *Mol Cell Endocrinol* 252, 224–230.

676

677 Knight, J.D., Tian, R., Lee, R.E., Wang, F., Beauvais, A., Zou, H., Megeney, L.A., Gingras, A.-  
678 C., Pawson, T., Figeys, D., et al. (2012). A novel whole-cell lysate kinase assay identifies  
679 substrates of the p38 MAPK in differentiating myoblasts. *Skeletal Muscle* 2, 1–12.

680

681 Kremontsov, D.N., Thornton, T.M., Teuscher, C., and Rincon, M. (2013). The Emerging Role of  
682 p38 Mitogen-Activated Protein Kinase in Multiple Sclerosis and Its Models. *Mol Cell Biol* 33,  
683 3728–3734.

684

685 Krom, Y.D., Dumonceaux, J., Mamchaoui, K., den Hamer, B., Mariot, V., Negroni, E., Geng,  
686 L.N., Martin, N., Tawil, R., Tapscott, S.J., et al. (2012). Generation of Isogenic D4Z4 Contracted  
687 and Noncontracted Immortal Muscle Cell Clones from a Mosaic Patient A Cellular Model for  
688 FSHD. *Am J Pathology* 181, 1387–1401.

689

690 Kyriakis, J., and Avruch, J. (2001). Mammalian mitogen-activated protein kinase signal  
691 transduction pathways activated by stress and inflammation. *Physiol Rev* 81, 807–869.

692

693 Lemmers, R.J., van der Vliet, P.J., Klooster, R., Sacconi, S., Camaño, P., Dauwerse, J.G.,

694 Snider, L., Straasheijm, K.R., van Ommen, G.J., Padberg, G.W., et al. (2010). A unifying genetic  
695 model for facioscapulohumeral muscular dystrophy. *Science (New York, N.Y.)* 329, 1650–1653.  
696

697 Lemmers, R.J., Tawil, R., Petek, L.M., Balog, J., Block, G.J., Santen, G.W., Amell, A.M., van der  
698 Vliet, P.J., Almomani, R., Straasheijm, K.R., et al. (2012). Digenic inheritance of an SMCHD1  
699 mutation and an FSHD-permissive D4Z4 allele causes facioscapulohumeral muscular dystrophy  
700 type 2. *Nat Genet* 44, 1370–1374.  
701

702 MacNee, W., Allan, R.J., Jones, I., Salvo, M., and Tan, L.F. (2013). Efficacy and safety of the  
703 oral p38 inhibitor PH-797804 in chronic obstructive pulmonary disease: a randomised clinical  
704 trial. *Thorax* 68, 738–745.  
705

706 Mahrus, S., Trinidad, J.C., Barkan, D.T., Sali, A., Burlingame, A.L., and Wells, J.A. (2008).  
707 Global Sequencing of Proteolytic Cleavage Sites in Apoptosis by Specific Labeling of Protein N  
708 Termini. *Cell* 134, 866–876.  
709

710 Martin, E., Bassi, R., and Marber (2015). p38 MAPK in cardioprotection – are we there yet? *Brit*  
711 *J Pharmacol* 172, 2101–2113.  
712

713 Mul, K., Lemmers, R., Kriek, M., van der Vliet, P.J., van den Boogaard, M.L., Badrising, U.A.,  
714 Graham, J.M., Lin, A.E., Brand, H., Moore, S.A., et al. (2018). FSHD type 2 and Bosma arhinia  
715 microphthalmia syndrome. *Neurology* 91, e562–e570.  
716

717 Norman, P. (2015). Investigational p38 inhibitors for the treatment of chronic obstructive  
718 pulmonary disease. *Expert Opinion on Investigational Drugs* 24, 383–392.  
719

720 van Overveld, P.G., Lemmers, R.J., Sandkuijl, L.A., Enthoven, L., Winokur, S.T., Bakels, F.,  
721 Padberg, G.W., van Ommen, G.-J.B., Frants, R.R., and van der Maarel, S.M. (2003).  
722 Hypomethylation of D4Z4 in 4q-linked and non-4q-linked facioscapulohumeral muscular  
723 dystrophy. *Nat Genet* 35, ng1262.  
724

725 Patnaik, A., Haluska, P., Tolcher, A.W., Erlichman, C., Papadopoulos, K.P., Lensing, J.L.,  
726 Beeram, M., Molina, J.R., Rasco, D.W., Arcos, R.R., et al. (2016). A First-in-Human Phase I  
727 Study of the Oral p38 MAPK Inhibitor, Ralimetinib (LY2228820 Dimesylate), in Patients with

728 Advanced Cancer. *Clinical Cancer Research* 22, 1095–1102.  
729  
730 Perdiguero, E., Ruiz-Bonilla, V., Gresh, L., Hui, L., Ballestar, E., Sousa-Victor, P., Baeza-Raja,  
731 B., Jardí, M., Bosch-Comas, A., Esteller, M., et al. (2007). Genetic analysis of p38 MAP kinases  
732 in myogenesis: fundamental role of p38 $\alpha$  in abrogating myoblast proliferation. *The EMBO*  
733 *Journal* 26, 1245–1256.  
734  
735 Rickard, A.M., Petek, L.M., and Miller, D.G. (2015). Endogenous DUX4 expression in FSHD  
736 myotubes is sufficient to cause cell death and disrupts RNA splicing and cell migration  
737 pathways. *Hum Mol Genet* 24, 5901–5914.  
738  
739 Sandri, M., Meslemani, E.A., Sandri, C., Schjerling, P., Vissing, K., Andersen, J., Rossini, K.,  
740 Carraro, U., and Angelini, C. (2001). Caspase 3 Expression Correlates With Skeletal Muscle  
741 Apoptosis in Duchenne and Facioscapulo Human Muscular Dystrophy. A Potential Target for  
742 Pharmacological Treatment? *J Neuropathology Exp Neurology* 60, 302–312.  
743  
744 Segalés, J., Perdiguero, E., and Muñoz-Cánoves, P. (2016a). Regulation of Muscle Stem Cell  
745 Functions: A Focus on the p38 MAPK Signaling Pathway. *Frontiers in Cell and Developmental*  
746 *Biology* 4, 91.  
747  
748 Segalés, J., Islam, A.B., Kumar, R., Liu, Q.-C., Sousa-Victor, P., Dilworth, J.F., Ballestar, E.,  
749 Perdiguero, E., and Muñoz-Cánoves, P. (2016b). Chromatin-wide and transcriptome profiling  
750 integration uncovers p38 $\alpha$  MAPK as a global regulator of skeletal muscle differentiation.  
751 *Skeletal Muscle* 6, 9.  
752  
753 Shadle, S.C., Zhong, J., Campbell, A.E., Conerly, M.L., Jagannathan, S., Wong, C.-J., Morello,  
754 T.D., van der Maarel, S.M., and Tapscott, S.J. (2017). DUX4-induced dsRNA and MYC mRNA  
755 stabilization activate apoptotic pathways in human cell models of facioscapulohumeral  
756 dystrophy. *PLOS Genetics* 13, e1006658.  
757  
758 Shaw, N.D., Brand, H., Kupchinsky, Z.A., Bengani, H., Plummer, L., Jones, T.I., Erdin, S.,  
759 Williamson, K.A., Rainger, J., Stortchevoi, A., et al. (2017). SMCHD1 mutations associated with  
760 a rare muscular dystrophy can also cause isolated arhinia and Bosma arhinia microphthalmia  
761 syndrome. *Nature Genetics*.

762  
763 Simone, C., Forcales, S., Hill, D.A., Imbalzano, A.N., Latella, L., and Puri, P. (2004). p38  
764 pathway targets SWI-SNF chromatin-remodeling complex to muscle-specific loci. *Nat Genet* 36,  
765 738–743.  
766  
767 Snider, L., Geng, L.N., Lemmers, R., Kyba, M., Ware, C.B., Nelson, A.M., Tawil, R., Filippova,  
768 G.N., van der Maarel, S.M., Tapscott, S.J., et al. (2010). Facioscapulohumeral Dystrophy:  
769 Incomplete Suppression of a Retrotransposed Gene. *PLoS Genetics* 6, e1001181.  
770  
771 Statland, J.M., and Tawil, R. (2014). Risk of functional impairment in Facioscapulohumeral  
772 muscular dystrophy. *Muscle Nerve* 49, 520–527.  
773  
774 Statland, J.M., Odrzywolski, K.J., Shah, B., Henderson, D., Fricke, A.F., van der Maarel, S.M.,  
775 Tapscott, S.J., and Tawil, R. (2015). Immunohistochemical Characterization of  
776 Facioscapulohumeral Muscular Dystrophy Muscle Biopsies. *J Neuromuscul Dis* 2, 291–299.  
777  
778 Tasca, G., Pescatori, M., Monforte, M., Mirabella, M., Iannaccone, E., Frusciante, R., Cubeddu,  
779 T., Laschena, F., Ottaviani, P., and Ricci, E. (2012). Different Molecular Signatures in Magnetic  
780 Resonance Imaging-Staged Facioscapulohumeral Muscular Dystrophy Muscles. *PLoS ONE* 7,  
781 e38779.  
782  
783 Tawil, R., Forrester, J., Griggs, R.C., Mendell, J., Kissel, J., mott, M., King, W., Weiffenbach,  
784 B., and Figlewicz, D. (1996). Evidence for anticipation and association of deletion size with  
785 severity in facioscapulohumerd muscular dystrophy. *Ann Neurol* 39, 744–748.  
786  
787 Tawil, R., van der Maarel, S.M., and Tapscott, S.J. (2014). Facioscapulohumeral dystrophy: the  
788 path to consensus on pathophysiology. *Skeletal Muscle* 4, 1–15.  
789  
790 Tawil, R., Kissel, J.T., Heatwole, C., Pandya, S., Gronseth, G., and Benatar, M. (2015).  
791 Evidence-based guideline summary. *Neurology* 85, 357–364.  
792  
793 Thorley, M., Duguez, S., Mazza, E., Valsoni, S., Bigot, A., Mamchaoui, K., Harmon, B., Voit, T.,  
794 Mouly, V., and Duddy, W. (2016). Skeletal muscle characteristics are preserved in hTERT/cdk4  
795 human myogenic cell lines. *Skeletal Muscle* 6, 43.

796

797 Underwood, D., Osborn, R., Kotzer, C., Adams, J., Lee, J., Webb, E., Carpenter, D.,  
798 Bochnowicz, S., Thomas, H., Hay, D., et al. (2000). SB 239063, a potent p38 MAP kinase  
799 inhibitor, reduces inflammatory cytokine production, airways eosinophil infiltration, and  
800 persistence. *J Pharmacol Exp Ther* 293, 281–288.

801

802 van den Boogaard, M.L., Lemmers, R., Balog, J., Wohlgemuth, M., Auranen, M., Mitsunashi, S.,  
803 van der Vliet, P.J., Straasheijm, K.R., van den Akker, R., Kriek, M., et al. (2016). Mutations in  
804 DNMT3B Modify Epigenetic Repression of the D4Z4 Repeat and the Penetrance of  
805 Facioscapulohumeral Dystrophy. *Am J Hum Genetics* 98, 1020–1029.

806

807 Viemann, D., Goebeler, M., Schmid, S., Klimmek, K., Sorg, C., Ludwig, S., and Roth, J. (2004).  
808 Transcriptional profiling of IKK2/NF- $\kappa$ B— and p38 MAP kinase-dependent gene expression in  
809 TNF- $\alpha$ —stimulated primary human endothelial cells. *Blood* 103, 3365–3373.

810

811 Wang, L.H., Friedman, S.D., Shaw, D., Snider, L., Wong, C.-J., Budech, C.B., Poliachik, S.L.,  
812 Gove, N.E., Lewis, L.M., Campbell, A.E., et al. (2018). MRI-informed muscle biopsies correlate  
813 MRI with pathology and DUX4 target gene expression in FSHD. *Hum Mol Genet*.

814

815 Whiddon, J.L., Langford, A.T., Wong, C.-J., Zhong, J., and Tapscott, S.J. (2017). Conservation  
816 and innovation in the DUX4-family gene network. *Nature Genetics*.

817

818 Whitmarsh, A.J. (2010). A central role for p38 MAPK in the early transcriptional response to  
819 stress. *Bmc Biol* 8, 1–3.

820

821 Wissing, E.R., Boyer, J.G., Kwong, J.Q., Sargent, M.A., Karch, J., McNally, E.M., Otsu, K., and  
822 Molkentin, J.D. (2014). P38 $\alpha$  MAPK underlies muscular dystrophy and myofiber death through a  
823 Bax-dependent mechanism. *Human Molecular Genetics* 23, 5452–5463.

824

825 Yao, Z., Snider, L., Balog, J., Lemmers, R., Maarel, S.M., Tawil, R., and Tapscott, S.J. (2014).  
826 DUX4-induced gene expression is the major molecular signature in FSHD skeletal muscle. *Hum*  
827 *Mol Genet* 23, 5342–5352.

828

829 Zarubin, T., and Han, J. (2005). Activation and signaling of the p38 MAP kinase pathway. *Cell*



830 Res 15, 7290257.

831

832 Zeng, W., de Greef, J.C., Chen, Y.-Y., Chien, R., Kong, X., Gregson, H.C., Winokur, S.T., Pyle,  
833 A., Robertson, K.D., Schmiesing, J.A., et al. (2009). Specific Loss of Histone H3 Lysine 9  
834 Trimethylation and HP1 $\gamma$ /Cohesin Binding at D4Z4 Repeats Is Associated with  
835 Facioscapulohumeral Dystrophy (FSHD). *Plos Genet* 5, e1000559.

836

837 Zetser, A., Gredinger, E., and Bengal, E. (1999). p38 Mitogen-activated Protein Kinase Pathway  
838 Promotes Skeletal Muscle Differentiation PARTICIPATION OF THE MEF2C TRANSCRIPTION  
839 FACTOR. *J Biol Chem* 274, 5193–5200.

840
